# Supplementary material for: GABA transmission from mAL interneurons regulates aggression in Drosophila males
Source: PubMed Central journal article supplement — Proc Natl Acad Sci U S A. 2022 Jan 26;119(5):e2117101119. doi: 10.1073/pnas.2117101119 (PMC8812560; doi:10.1073/pnas.2117101119), 2022-01-26
Supplement: pnas.2117101119.sapp.pdf [file pnas.2117101119.sapp.pdf]

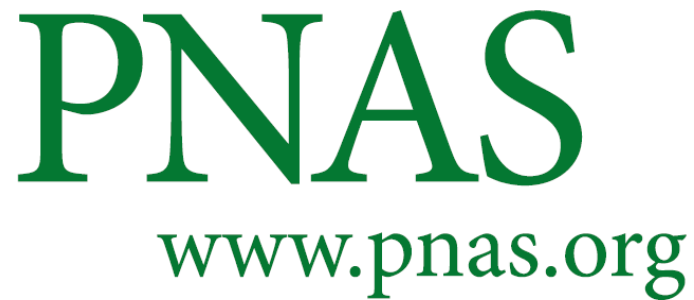

Supplementary Information for

**GABA transmission from mAL interneurons regulates aggression in *Drosophila* males**

Saheli Sengupta<sup>1†</sup>, Yick-Bun Chan<sup>1</sup>, Caroline B. Palavicino-Maggio<sup>1</sup> and Edward A. Kravitz<sup>1†</sup>

Corresponding authors

[Saheli\\_Sengupta@hms.harvard.edu](mailto:Saheli_Sengupta@hms.harvard.edu)  
[edward\\_kravitz@hms.harvard.edu](mailto:edward_kravitz@hms.harvard.edu)

**This PDF file includes:**

Figures S1 to S9  
Legends for Movies S1 to S5  
Legends for Dataset S1 and Dataset S2

**Other supplementary materials for this manuscript include the following:**

Movies S1 to S5  
Dataset S1 and Dataset S2

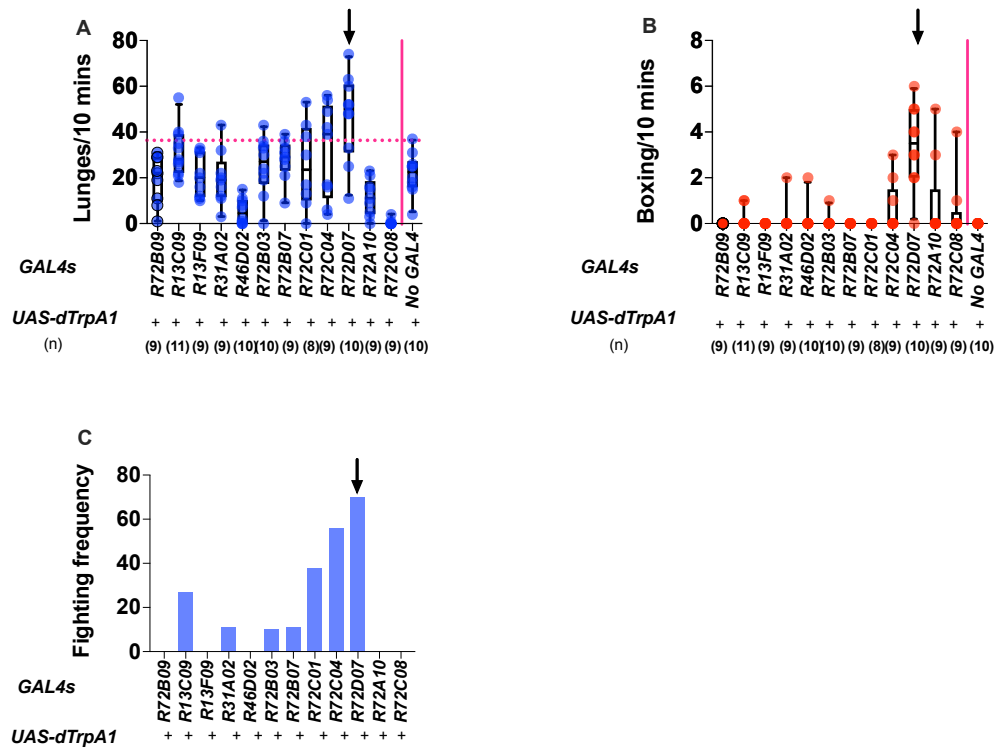

**Fig.S1. Preliminary screening of 12 GAL4s to identify aggression promoting neurons:** (A) Lunges and (B) boxing during thermogenetic activation of 12 GAL4-targeted neurons at 30°C. In A and B, data is plotted as box plot with whiskers extending to the 10<sup>th</sup> and the 90<sup>th</sup> percentile with a line at median. Each of the circles in A and B represents lunges per 10 mins and boxing per 10 mins, respectively at 30°C. GAL4 lines used, and number of fights performed for each GAL4 are indicated below respective figures. A pink solid vertical line separates the *No-GAL4/USAS-dTrpA1* control from the 12 *GAL4/USAS-dTrpA1* combinations in both A and B. A cut-off for lunges (pink dotted line) was set at the 90<sup>th</sup> percentile of the *No-GAL4/USAS-dTrpA1* control in A. *R72D07-GAL4/USAS-dTrpA1* and *R72C04-GAL4/USAS-dTrpA1* had medians for lunges above the cut-off in A. Since the median for *R72D07-GAL4/USAS-dTrpA1* was higher than that for *R72C04-GAL4/USAS-dTrpA1*, it was selected for further analysis. *R72D07-GAL4/USAS-dTrpA1* also had the highest median for boxing in B. (C) *R72D07-GAL4/USAS-dTrpA1* has the highest fighting frequency. Fighting frequency is defined as the percentage of fights with lunges above the cut-off. Black arrows in A-C point at *R72D07-GAL4/USAS-dTrpA1*.

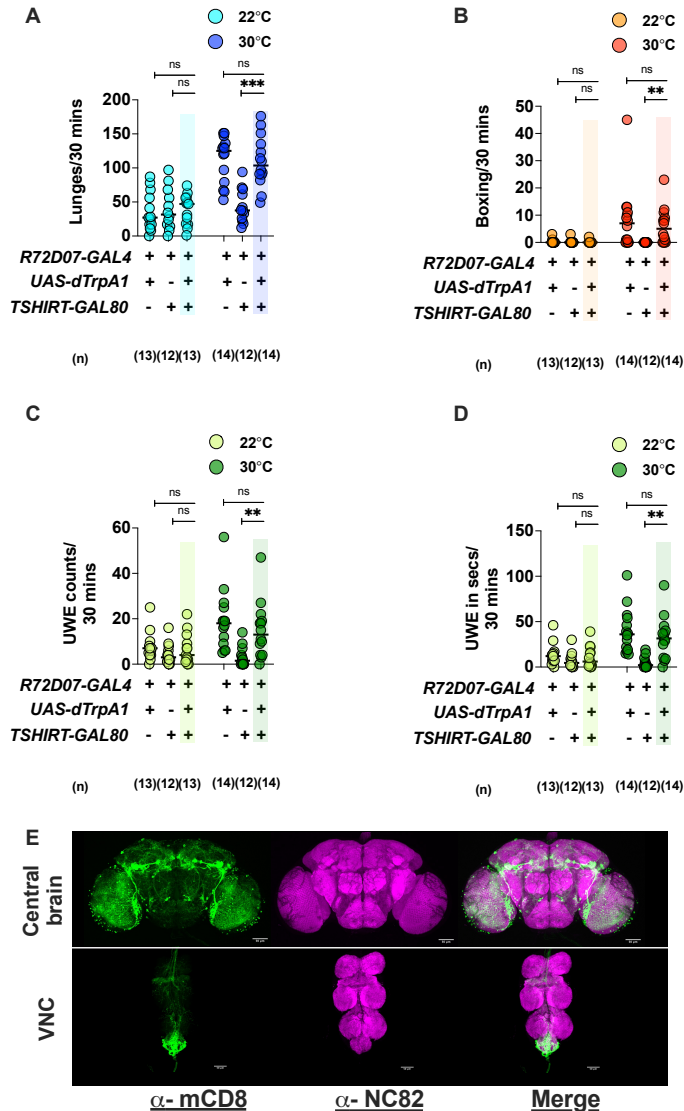

**Fig. S2. Thermogenetic activation of *R72D07-GAL4* central brain neurons is sufficient for increasing both aggression and UWEs: *Tshirt-Gal80* was used to limit GAL4 activity in the central brain of *R72D07-GAL4*. Similar to the *R72D07-GAL4/UAS-dTrpA1* fights (Fig.1 A-D), *Tshirt-Gal80; R72D07-GAL4/UAS-dTrpA1* fights display increased (A) lunges, (B) boxing, (C) UWE counts, and (D) UWE time, upon thermogenetic activation at 30°C. For A-D, each circle represents lunges per 30 mins, boxing per 30 mins, UWE counts per 30 mins, and UWE time in seconds per 30 mins, respectively. For A-D, Kruskal Wallis test followed by post-hoc Dunn's was performed for both the temperatures (\*\* $P < 0.01$ , \*\*\* $P < 0.001$ , ns = not significant at  $P > 0.05$ ). Genotypes and number of pairs used are shown below each plot (E) *Tshirt-Gal80* expression reduces GAL4-mediated *mCD8:GFP* expression in the VNC of *R72D07-GAL4*: Representative images of central brain (upper panel) and VNC (lower panel) of *Tshirt-Gal80; R72D07-GAL4/UAS-mCD8:GFP* male.  $\alpha$ -mCD8 (green) marks the neurons targeted by *R72D07-GAL4* in presence of *Tshirt-Gal80*. Neuropil marker  $\alpha$ -NC82 visualizes the brain and VNC. Images are maximum projection through all optical slices. (Scale bar, 50  $\mu$ m.)**

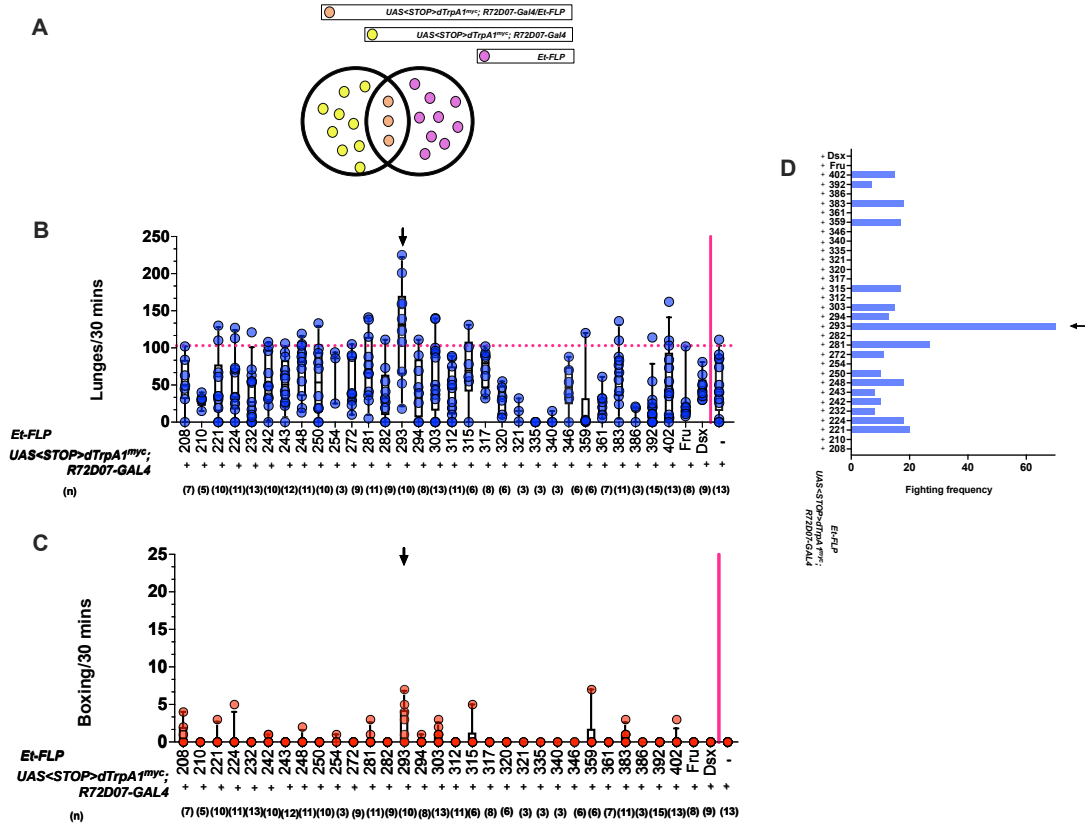

**Fig. S3. Intersectional genetics strategy for reducing neurons:** (A) Venn diagram showing the intersectional genetics strategy: Yellow circles represent neurons targeted in  $UAS<STOP>dTrpA1^{myc}; R72D07-Gal4$ . Pink circles represent neurons targeted in different  $Et-FLP$  lines. Peach circles represent neurons targeted in  $UAS<STOP>dTrpA1^{myc}; R72D07-Gal4/Et-FLP$  (or  $R72D07 \cap Et-FLP$ ). (B) Lunges and (C) boxing during thermogenetic activation of 32  $R72D07 \cap Et-FLP$  combinations at 30°C. In B and C, data is plotted as box plot with whiskers extending to the 10<sup>th</sup> and the 90<sup>th</sup> percentile with a line at median. Each of circles in B and C represents lunges per 30 mins and boxing per 30 mins respectively. Each of the 32  $Et-FLP$  lines is denoted by a specific number and indicated below the figures. Number of pairs tested for each intersectional combination is also indicated below the figures. A pink solid vertical line separates  $R72D07 \cap No-FLP$  control from the 32  $R72D07 \cap Et-FLP$  combinations in both B and C. A cut-off for lunges (pink dotted line) was set at the 90<sup>th</sup> percentile of the  $R72D07 \cap No-FLP$  control in B.  $R72D07 \cap 293-FLP$  is the only combination to have a median for lunges above the cut-off. (D)  $R72D07 \cap 293-FLP$  has the highest fighting frequency. Fighting frequency is defined as percentage of fights with lunges above the cut-off. Black arrows in B-D point at  $R72D07 \cap 293-FLP$ .

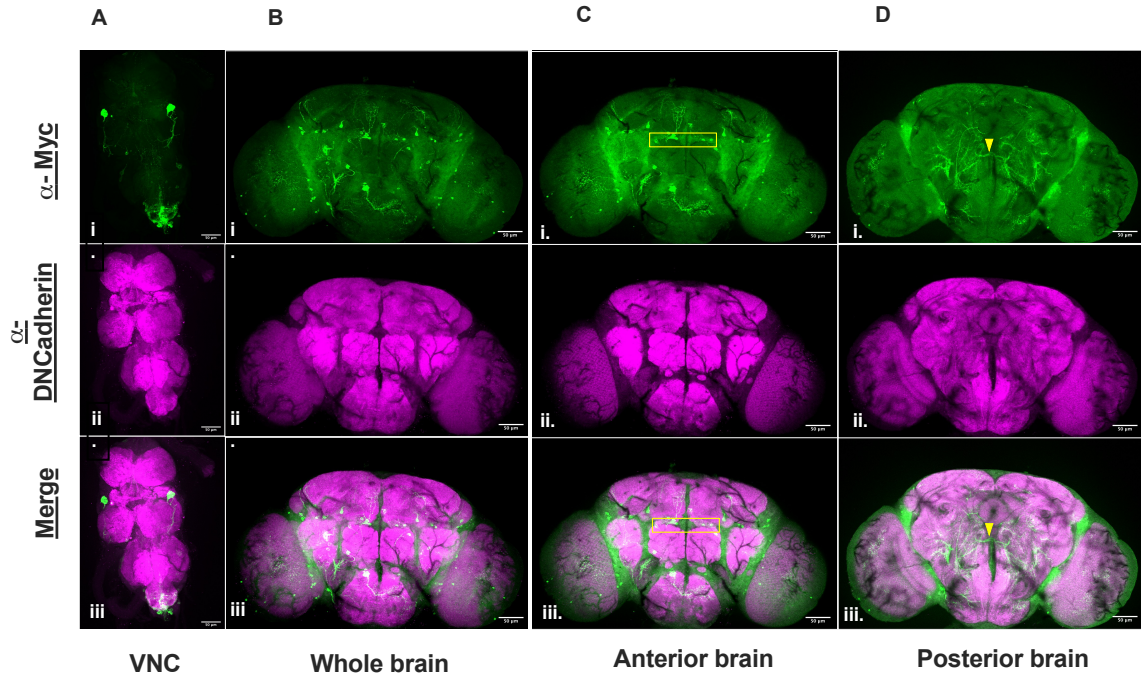

**Fig. S4. *R72D07∩293-FLP* brain includes a small group of mAL resembling neurons:** Compared to *R72D07-GAL4* (Fig.2 A and B), the intersectional combination of *R72D07∩293-FLP* has reduced number of neurons in both (A) VNC and (B) central brain.  $\alpha$ -Myc (green) reveals the neurons targeted by *R72D07∩293-FLP*. The neuropil marker  $\alpha$ -DNCadherin (magenta) visualizes the brain and VNC. *R72D07∩293-FLP* also targets a small group of mAL resembling neurons. (C) Cell bodies of this group are located above ALs (yellow rectangle), like mAL. (D) Processes of this group exhibit midline crossing (yellow arrow), and descend to the SOG, like mAL. A and B are maximum projection through all the optical slices of the confocal stack. C and D are maximum projection of optical slices containing the cell bodies and processes of the mAL-resembling group, respectively. (Scale bar, 50  $\mu$ m)

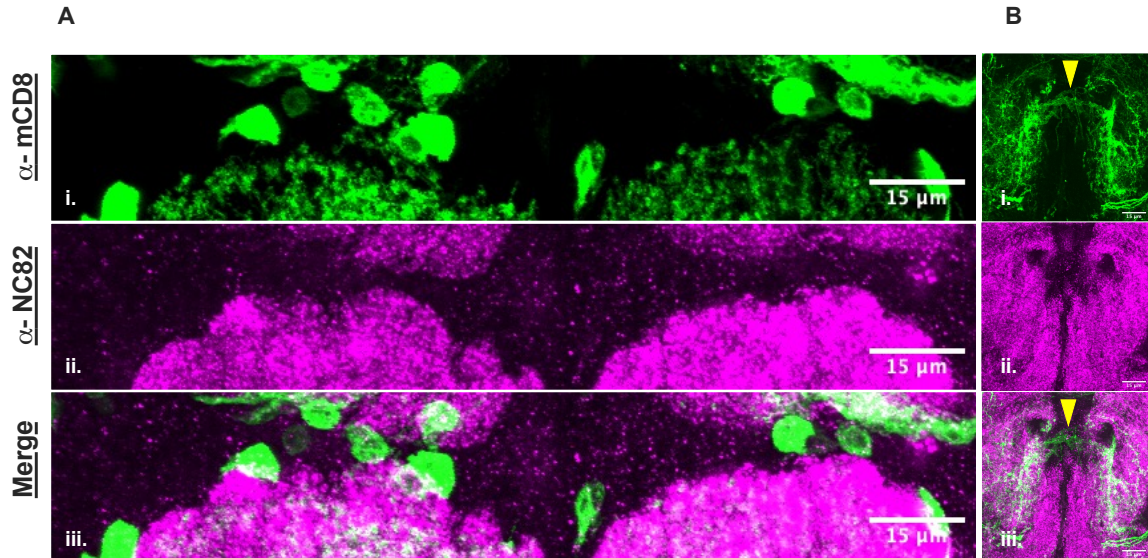

**Fig. S5. *R72D07-GAL4* targets a small group of mAL-resembling neurons:** The *R72D07-GAL4* labels a small group of approximately 3 to 5 cells per brain hemisphere with anatomical resemblance to mAL. (A) Cell bodies and (B) processes of the mAL-resembling group are visualized by  $\alpha$ -mCD8 signal (green) in a *R72D07-GAL4/UAS-mCD8* brain, visualized by the neuropil marker  $\alpha$ -NC82 (magenta). Like the mAL neurons, cell bodies of this group are located above ALs, and the processes exhibit midline crossing (yellow arrow) and descend towards SOG. Both A and B are maximum projections through the optical slices containing the cell bodies and processes of the mAL-resembling group, respectively. (Scale bar, 15  $\mu$ m)

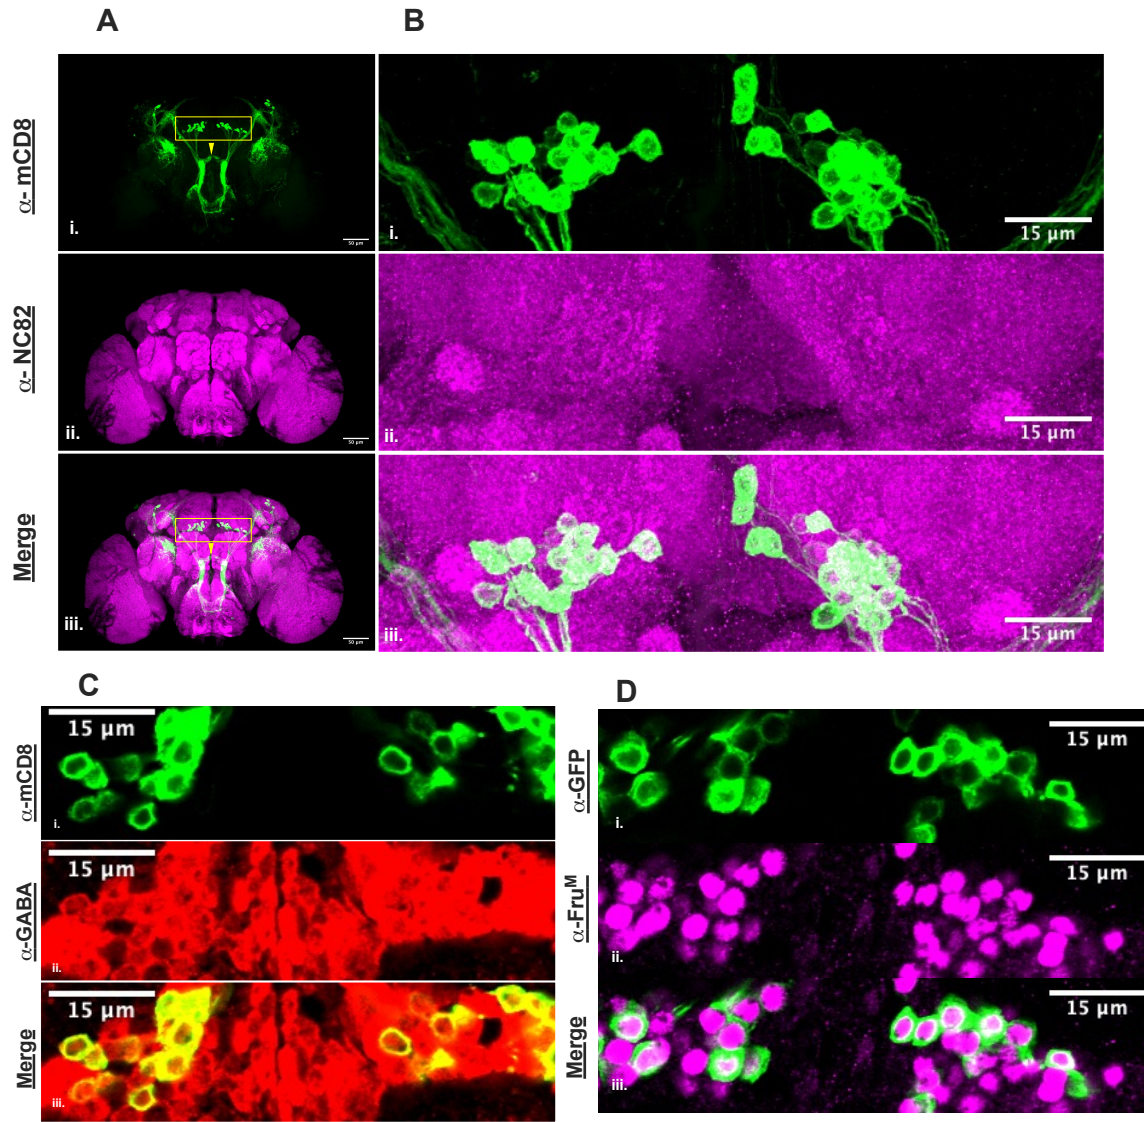

**Fig. S6. *R43D01-GAL4* primarily drives into the FruM<sup>+</sup> GABA<sup>+</sup> mAL cluster:** (A) Cell bodies of the mAL cluster are located above ALs (yellow rectangle). mAL processes show midline crossing (yellow arrow) before descending to the SOG (Scale bar, 50  $\mu$ m). (B) Magnified image of mAL cell bodies on the ALs. In A and B,  $\alpha$ -mCD8 (green) marks the neurons and  $\alpha$ -NC82 (magenta) visualizes the brain. (C) mAL cells (green,  $\alpha$ -mCD8) are GABA<sup>+</sup> (red,  $\alpha$ -GABA). (D) mAL cells (green,  $\alpha$ -GFP) are FruM<sup>+</sup> (magenta,  $\alpha$ -FruM). A and B are maximum projection through all the optical slices of the confocal stack. In C and D, overlap of signals in a single optical slice is shown for accurate representation. (Scale bar, 15  $\mu$ m in B-D).

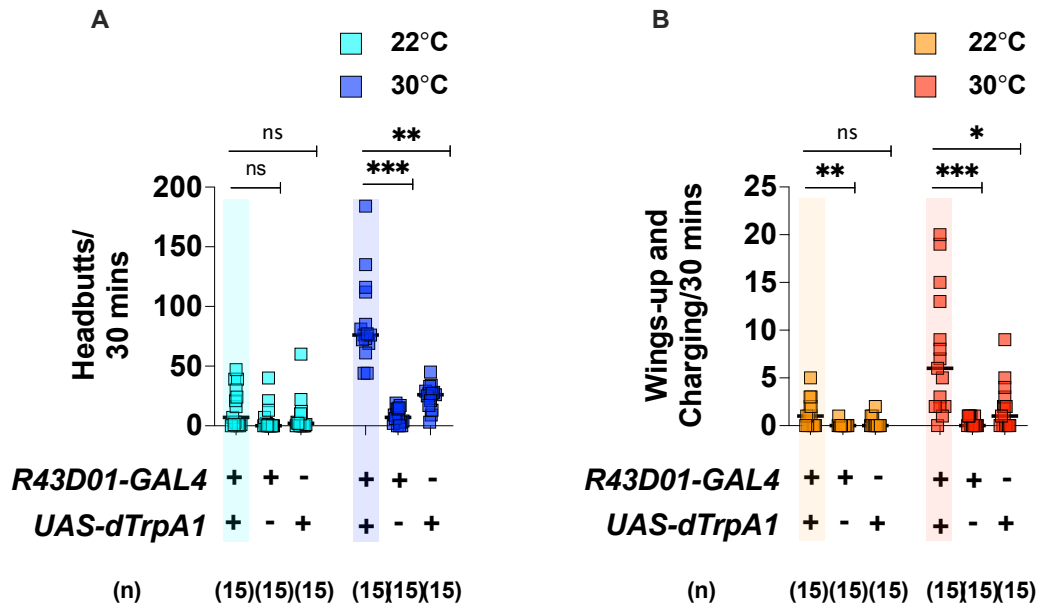

**Fig. S7. Thermogenetic activation of mAL neurons increases aggression in interfemale fights:** “Headbutts” and “wings-up and charging” are motor programs of aggression used by *Drosophila* females. Thermogenetic activation of mAL neurons at 30°C in females significantly increases (A) headbutts, and (B) Wings-up and charging, compared to the parental controls. For A and B, each square represents headbutts per 30 mins and Wings-up and charging per 30 mins respectively. For A and B, Kruskal Wallis test followed by post-hoc Dunn’s was performed for the control and experimental temperatures of 22°C and 30°C respectively (\* $P < 0.05$ , \*\* $P < 0.01$ , \*\*\* $P < 0.001$ , ns = not significant at  $P > 0.05$ ). Genotypes and number of pairs used are shown below each plot.



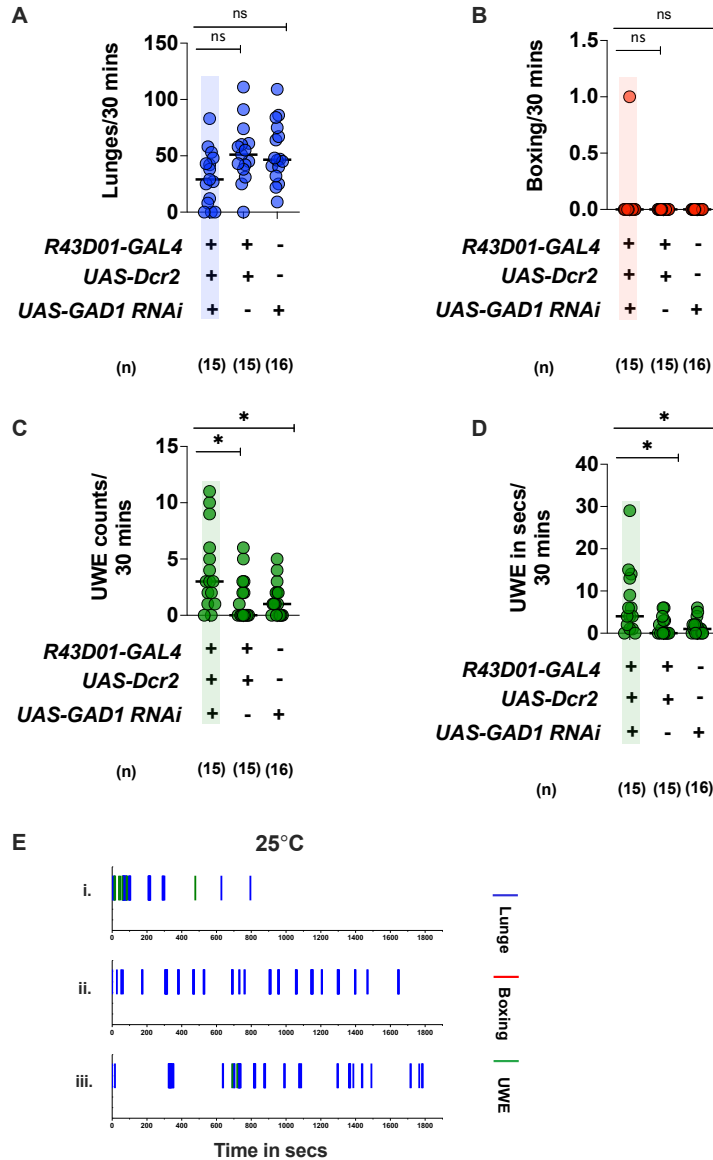

**Fig. S8. GABA knockdown in mAL neurons reduces lunges and increases UWEs in intermale fights:** mAL *GAD1 RNAi* fights have the lowest median for (A) lunges (also see text). mAL *GAD1 RNAi* fights have significantly increased (C) UWE counts, and (D) UWE time, compared to the parental controls. For A-D, each circle represents lunges per 30 mins, boxing per 30 mins, UWE counts per 30 mins, and UWE time in seconds per 30 mins, respectively. For A-D, Kruskal Wallis test followed by post-hoc Dunn's was performed ( $*P < 0.05$ , ns = not significant at  $P > 0.05$ ). Genotypes and number of pairs used are shown below each plot. (E) *GAD1 RNAi* in mAL neurons decreases lunges and increases UWEs in intermale fights: The x-axis represents the observation period which is 1,800 s (or 30 min). Representative fights of (i) *UAS-Dcr2/UAS-GAD1RNAi*; *R43D01-GAL4* (ii) *UAS-Dcr2*; *R43D01-GAL4* only control (iii) *UAS-GAD1 RNAi* only control.

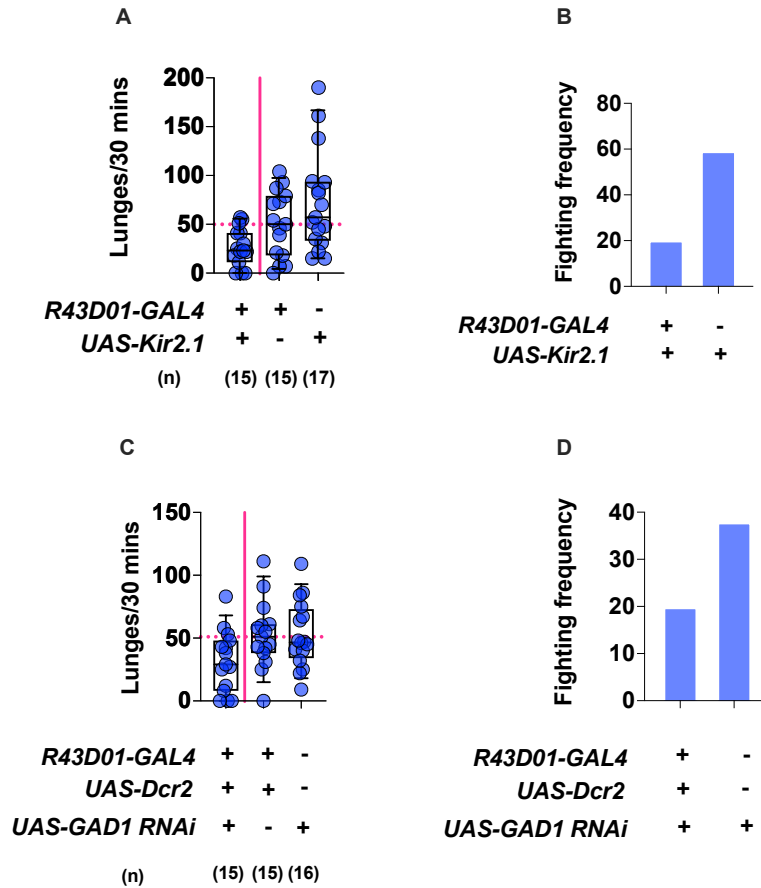

**Fig. S9. Suboptimal mAL activation decreases lunges in intermale fights:** (A) mAL inactivation by Kir2.1 has the lowest median for lunges. Data is plotted as box plot with whiskers extending to the 10<sup>th</sup> and the 90<sup>th</sup> percentile with a line at median in A. A vertical pink solid line separates the experimental line with mAL inactivation from the two parental control lines. For calculating fighting frequency, a cut-off (pink dotted line) is set at the median or the 50<sup>th</sup> percentile of the *R43D01-GAL4* only parental controls. Fighting frequency is described as the percentage of fights with lunge numbers above the cut-off. (B) Experimental fights with mAL inactivation have reduced fighting frequency. Only 20% of these fights have lunge numbers above the cut-off, whereas 59% of the *UAS-Kir2.1* only parental control fights have lunges above the cut-off. (C) mAL *GAD1* RNAi has the lowest median for lunges. Data is plotted as box plot with whiskers extending to the 10<sup>th</sup> and the 90<sup>th</sup> percentile with a line at median in C. A vertical pink solid line separates the experimental line with mAL *GAD1* RNAi from the two parental control lines. For calculating fighting frequency, a cut-off (pink dotted line) was set at the median or the 50<sup>th</sup> percentile of the *UAS-Dcr2*; *R43D01-GAL4* only parental controls. Fighting frequency is described as the percentage of fights with lunge numbers above the cut-off. (D) mAL *GAD1* RNAi fights have reduced fighting frequency. Only 18% of these fights have lunges above the cut-off, whereas 38% of the *UAS-GAD1 RNAi* only parental fights have lunges above the cut-off. Each of the circles in A and C represents lunges per 30 mins. Genotypes are indicated below respective plots.

## **Legends for Supplementary movies 1-5**

**Movie S1. Thermogenetically activated *R72D07-GAL4/UAS-dTrpA1* intermale fight:** dTrpA1-activated *R72D07-GAL4* intermale fight is characterized by increased lunging, boxing, and UWEs.

**Movie S2. Thermogenetically activated *R72D07-GAL4/UAS-dTrpA1* intermale fight:** Lateral view of a dTrpA1-activated *R72D07-GAL4* intermale fight: Behavior chamber was modified to facilitate recording. This fight was recorded only for the purpose of demonstration and not used in any calculation. dTrpA1-activated *R72D07-GAL4* intermale fight is characterized by increased lunging, boxing and UWEs.

**Movie S3. Thermogenetically activated *R72D07∩293-FLP* intermale fight:** dTrpA1-activated *R72D07∩293-FLP* intermale fight is characterized by increased lunging without any observable increase in boxing or UWEs.

**Movie S4. Thermogenetic activation of mAL neurons increases intermale lunging:** dTrpA1-mediated mAL activation increases intermale lunging without any observable change in boxing or UWEs.

**Movie S5. Silencing of mAL neurons decreases intermale aggression but increases UWEs:** Kir2.1-mediated mAL silencing decreases intermale lunging but increases intermale UWEs.

**Dataset 1: List of full genotypes**

**Dataset 2: List of *P* values**
