# Supplementary material for: GABA transmission from mAL interneurons regulates aggression in Drosophila males
Source: PubMed Central journal article supplement — Proc Natl Acad Sci U S A. 2022 Jan 26;119(5):e2117101119. doi: 10.1073/pnas.2117101119 (PMC8812560; doi:10.1073/pnas.2117101119), 2022-01-26
Supplement: pnas.2117101119.sd01.pdf [file pnas.2117101119.sd01.pdf]

**Dataset 1: List of full genotypes**

| <b>Figure</b> | <b>Genotype</b>                                                                                                            |
|---------------|----------------------------------------------------------------------------------------------------------------------------|
| 1             | <i>w</i> <sup>-</sup> / <i>Y</i> ;+/+;R72D07-GAL4/UAS- <i>dTrpA1</i>                                                       |
|               | <i>w</i> <sup>-</sup> / <i>Y</i> ;+/+;R72D07-GAL4/+                                                                        |
|               | <i>w</i> <sup>-</sup> / <i>Y</i> ;+/+; UAS- <i>dTrpA1</i> /+                                                               |
| 2             | <i>w</i> <sup>-</sup> / <i>Y</i> ;+/+; R72D07-GAL4/UAS- <i>mCD8:GFP</i>                                                    |
| 3             | <i>w</i> <sup>-</sup> / <i>Y</i> ;+/+;R43D01-GAL4/UAS- <i>dTrpA1</i>                                                       |
|               | <i>w</i> <sup>-</sup> / <i>Y</i> ;+/+;R43D01-GAL4/+                                                                        |
|               | <i>w</i> <sup>-</sup> / <i>Y</i> ;+/+; UAS- <i>dTrpA1</i> /+                                                               |
| 4             | <i>w</i> <sup>-</sup> / <i>Y</i> ;+/+;R43D01-GAL4/UAS- <i>dTrpA1</i>                                                       |
|               | <i>w</i> <sup>-</sup> / <i>Y</i> ;UAS- <i>Dcr2</i> /+;R43D01-GAL4/UAS- <i>dTrpA1</i>                                       |
|               | <i>w</i> <sup>-</sup> / <i>Y</i> ;UAS- <i>Dcr2</i> /UAS- <i>GAD1 RNAi</i> <sup>51794</sup> ;R43D01-GAL4/UAS- <i>dTrpA1</i> |
|               | <i>w</i> <sup>-</sup> / <i>Y</i> ;UAS- <i>Dcr2</i> /UAS- No <i>RNAi</i> <sup>36304</sup> ;R43D01-GAL4/UAS- <i>dTrpA1</i>   |
| 5             | <i>w</i> <sup>-</sup> / <i>Y</i> ;UAS- <i>Kir2.1</i> /+;R43D01-GAL4/+                                                      |
|               | <i>w</i> <sup>-</sup> / <i>Y</i> ;+/+;R43D01-GAL4/+                                                                        |
|               | <i>w</i> <sup>-</sup> / <i>Y</i> ;UAS- <i>Kir2.1</i> /+;+/+                                                                |
| 6A-6D         | <i>w</i> <sup>-</sup> / <i>Y</i> ;+/+;R72D07-GAL4/UAS- <i>dTrpA1</i>                                                       |
|               | <i>w</i> <sup>-</sup> / <i>Y</i> ;LexAop2-GAL80/+;R72D07-GAL4/UAS- <i>dTrpA1</i>                                           |
|               | <i>w</i> <sup>-</sup> / <i>Y</i> ;LexAop2-GAL80/R43D01-LexA;R72D07-GAL4/UAS- <i>dTrpA1</i>                                 |
| 6E            | Same as Figure 2                                                                                                           |
| S1            | See figure legend                                                                                                          |
| S2A-S2D       | <i>w</i> <sup>-</sup> / <i>Y</i> ;+/+;R72D07-GAL4/UAS- <i>dTrpA1</i>                                                       |
|               | <i>w</i> <sup>-</sup> / <i>Y</i> ; TSHIRT-GAL80/+;R72D07-GAL4/+                                                            |
|               | <i>w</i> <sup>-</sup> / <i>Y</i> ; TSHIRT-GAL80/+;R72D07-GAL4/UAS- <i>dTrpA1</i>                                           |
| S2E           | <i>w</i> <sup>-</sup> / <i>Y</i> ; TSHIRT-GAL80/+;R72D07-GAL4/UAS- <i>mCD8:GFP</i>                                         |
| S3            | See text and Figure legend                                                                                                 |
| S4            | <i>w</i> <sup>-</sup> / <i>Y</i> ; UAS<STOP> <i>dTrpA1</i> <sup>myc</sup> ; R72D07-GAL4/293 <sup>Et-FLP</sup> and see text |
| S5            | Same as Figure 2                                                                                                           |
| S6            | <i>w</i> <sup>-</sup> / <i>Y</i> ;+/+;R43D01-GAL4/ UAS- <i>mCD8:GFP</i>                                                    |
| S7            | <i>w</i> <sup>-</sup> ;+/+;R43D01-GAL4/UAS- <i>dTrpA1</i>                                                                  |
|               | <i>w</i> <sup>-</sup> ;+/+;R43D01-GAL4/+                                                                                   |
|               | <i>w</i> <sup>-</sup> ;+/+; UAS- <i>dTrpA1</i> /+                                                                          |
| S8            | <i>w</i> <sup>-</sup> / <i>Y</i> ;UAS- <i>Dcr2</i> / UAS- <i>GAD1 RNAi</i> <sup>51794</sup> ;R43D01-GAL4/+                 |
|               | <i>w</i> <sup>-</sup> / <i>Y</i> ;UAS- <i>Dcr2</i> /+;R43D01-GAL4/+                                                        |
|               | <i>w</i> <sup>-</sup> / <i>Y</i> ;UAS- <i>GAD1 RNAi</i> <sup>51794</sup> /+;+/+                                            |
| S9            | See Figure 5 and S8                                                                                                        |
