# Supplementary material for: GABA transmission from mAL interneurons regulates aggression in Drosophila males
Source: PubMed Central journal article supplement — Proc Natl Acad Sci U S A. 2022 Jan 26;119(5):e2117101119. doi: 10.1073/pnas.2117101119 (PMC8812560; doi:10.1073/pnas.2117101119), 2022-01-26
Supplement: pnas.2117101119.sd02.pdf [file pnas.2117101119.sd02.pdf]

**Dataset 2: List of *P* values**

|                | <b>Kruskal Wallis P-value</b> | <b>Post-hoc Dunn's multiple comparisons test</b>       | <b>Adjusted P-value</b> |
|----------------|-------------------------------|--------------------------------------------------------|-------------------------|
| <b>Fig. 1A</b> | (22°C)<br>0.0176              | <i>R72D07-GAL4/UAS-dTrpA1</i> V/S <i>R72D07-GAL4/+</i> | 0.1848                  |
|                |                               | <i>R72D07-GAL4/UAS-dTrpA1</i> V/S <i>UAS-dTrpA1/+</i>  | 0.0092                  |
|                | (30°C)<br>0.0007              | <i>R72D07-GAL4/UAS-dTrpA1</i> V/S <i>R72D07-GAL4/+</i> | 0.0019                  |
|                |                               | <i>R72D07-GAL4/UAS-dTrpA1</i> V/S <i>UAS-dTrpA1/+</i>  | 0.0023                  |
| <b>Fig. 1B</b> | (22°C)<br>0.0714              | P values >0.05                                         | P values >0.05          |
|                | (30°C)<br><0.0001             | <i>R72D07-GAL4/UAS-dTrpA1</i> V/S <i>R72D07-GAL4/+</i> | <0.0001                 |
|                |                               | <i>R72D07-GAL4/UAS-dTrpA1</i> V/S <i>UAS-dTrpA1/+</i>  | <0.0001                 |
| <b>Fig. 1C</b> | (22°C)<br>0.6701              | P values >0.05                                         | P values >0.05          |
|                | (30°C)<br><0.0001             | <i>R72D07-GAL4/UAS-dTrpA1</i> V/S <i>R72D07-GAL4/+</i> | <0.0001                 |
|                |                               | <i>R72D07-GAL4/UAS-dTrpA1</i> V/S <i>UAS-dTrpA1/+</i>  | <0.0001                 |
| <b>Fig. 1D</b> | (22°C)<br>0.6701              | P values >0.05                                         | P values >0.05          |
|                | (30°C)<br><0.0001             | <i>R72D07-GAL4/UAS-dTrpA1</i> V/S <i>R72D07-GAL4/+</i> | <0.0001                 |
|                |                               | <i>R72D07-GAL4/UAS-dTrpA1</i> V/S <i>UAS-dTrpA1/+</i>  | <0.0001                 |

|                | <b>Kruskal Wallis P-value</b> | <b>Post-hoc Dunn's multiple comparisons test</b> | <b>Adjusted P-value</b> |
|----------------|-------------------------------|--------------------------------------------------|-------------------------|
| <b>Fig. 3A</b> | (22°C)<br>0.0676              | P values >0.05                                   | P values >0.05          |

**Dataset 2: List of P values**

|                |                   |                                                 |                |
|----------------|-------------------|-------------------------------------------------|----------------|
|                | (30°C)<br><0.0001 | <i>R43D01-GAL4/UAS-dTrpA1 V/S R43D01-GAL4/+</i> | <0.0001        |
|                |                   | <i>R43D01-GAL4/UAS-dTrpA1 V/S UAS-dTrpA1/+</i>  | 0.0146         |
| <b>Fig. 3B</b> | (22°C)<br>0.3442  | P values >0.05                                  | P values >0.05 |
|                | (30°C)<br>0.0695  | P values >0.05                                  | P values >0.05 |
| <b>Fig. 3C</b> | (22°C)<br>0.3743  | P values >0.05                                  | P values >0.05 |
|                | (30°C)<br>0.1913  | P values >0.05                                  | P values >0.05 |
| <b>Fig. 3D</b> | (22°C)<br>0.4842  | P values >0.05                                  | P values >0.05 |
|                | (30°C)<br>0.2100  | P values >0.05                                  | P values >0.05 |

|                | <b>Kruskal Wallis P- value</b> | <b>Post-hoc Dunn's multiple comparisons test</b>                                                        | <b>Adjusted P-value</b> |
|----------------|--------------------------------|---------------------------------------------------------------------------------------------------------|-------------------------|
| <b>Fig. 4A</b> | (22°C)<br>0.2525               | P values >0.05                                                                                          | P values >0.05          |
|                | (30°C)<br><0.0001              | <i>UAS-Dcr2/UAS-GAD1 RNAi; R43D01-GAL4/UAS-dTrpA1 V/S R43D01-GAL4/UAS-dTrpA1</i>                        | <0.0001                 |
|                |                                | <i>UAS-Dcr2/UAS-GAD1 RNAi; R43D01-GAL4/UAS-dTrpA1V/S UAS-Dcr2/+; R43D01-GAL4/UAS-dTrpA1</i>             | <0.0001                 |
|                |                                | <i>UAS-Dcr2/UAS- GAD1 RNAi; R43D01-GAL4/UAS-dTrpA1V/S UAS-Dcr2/UAS- No RNAi; R43D01-GAL4/UAS-dTrpA1</i> | 0.0074                  |
| <b>Fig. 4B</b> | (22°C)<br>0.2874               | P values >0.05                                                                                          | P values >0.05          |
|                | (30°C)<br>0.1769               | P values >0.05                                                                                          | P values >0.05          |

**Dataset 2: List of P values**

|                |                  |                                                                                                         |                |
|----------------|------------------|---------------------------------------------------------------------------------------------------------|----------------|
| <b>Fig. 4C</b> | (22°C)<br>0.0063 | <i>UAS-Dcr2/UAS- GAD1 RNAi; R43D01-GAL4/UAS-dTrpA1 V/S R43D01-GAL4/UAS-dTrpA1</i>                       | 0.0044         |
|                |                  | <i>UAS-Dcr2/UAS- GAD1 RNAi; R43D01-GAL4/UAS-dTrpA1V/S UAS-Dcr2/+; R43D01-GAL4/UAS-dTrpA1</i>            | 0.0148         |
|                |                  | <i>UAS-Dcr2/UAS- GAD1 RNAi; R43D01-GAL4/UAS-dTrpA1V/S UAS-Dcr2/UAS- No RNAi; R43D01-GAL4/UAS-dTrpA1</i> | 0.0669         |
|                | (30°C)<br>0.6243 | P values >0.05                                                                                          | P values >0.05 |
| <b>Fig. 4D</b> | (22°C)<br>0.0025 | <i>UAS-Dcr2/UAS- GAD1 RNAi; R43D01-GAL4/UAS-dTrpA1 V/S R43D01-GAL4/UAS-dTrpA1</i>                       | 0.0018         |
|                |                  | <i>UAS-Dcr2/UAS- GAD1 RNAi; R43D01-GAL4/UAS-dTrpA1V/S UAS-Dcr2/+; R43D01-GAL4/UAS-dTrpA1</i>            | 0.0059         |
|                |                  | <i>UAS-Dcr2/UAS- GAD1 RNAi; R43D01-GAL4/UAS-dTrpA1V/S UAS-Dcr2/UAS- No RNAi; R43D01-GAL4/UAS-dTrpA1</i> | 0.1226         |
|                | (30°C)<br>0.6004 | P values >0.05                                                                                          | P values >0.05 |

|                | <b>Kruskal Wallis P-value</b> | <b>Post-hoc Dunn's multiple comparisons test</b> | <b>Adjusted P-value</b> |
|----------------|-------------------------------|--------------------------------------------------|-------------------------|
| <b>Fig. 5A</b> | (25°C)<br>0.0128              | <i>R43D01-GAL4/UAS-Kir2.1 v/s R43D01-GAL4/+</i>  | 0.1573                  |
|                |                               | <i>R43D01-GAL4/UAS-Kir2.1 v/s UAS-Kir2.1/+</i>   | 0.0066                  |
| <b>Fig. 5B</b> | (25°C)<br>0.4138              | P values >0.05                                   | P values >0.05          |
| <b>Fig. 5C</b> | (25°C)<br><0.0001             | <i>R43D01-GAL4/UAS-Kir2.1 v/s R43D01-GAL4/+</i>  | <0.0001                 |

**Dataset 2:** List of *P* values

|                |                   |                                                 |         |
|----------------|-------------------|-------------------------------------------------|---------|
|                |                   | <i>R43D01-GAL4/UAS-Kir2.1 v/s UAS-Kir2.1/+</i>  | 0.0015  |
| <b>Fig. 5D</b> | (25°C)<br><0.0001 | <i>R43D01-GAL4/UAS-Kir2.1 v/s R43D01-GAL4/+</i> | <0.0001 |
|                |                   | <i>R43D01-GAL4/UAS-Kir2.1 v/s UAS-Kir2.1/+</i>  | 0.0015  |

|                | <b>Kruskal Wallis P-value</b> | <b>Post-hoc Dunn's multiple comparisons test</b>                                                     | <b>Adjusted P-value</b> |
|----------------|-------------------------------|------------------------------------------------------------------------------------------------------|-------------------------|
| <b>Fig. 6A</b> | (22°C)<br>0.1085              | P values >0.05                                                                                       | P values >0.05          |
|                | (30°C)<br>0.0011              | <i>LexAop2-GAL80/R43D01-LexA; R72D07-GAL4/UAS-dTrpA1 V/S R72D07-GAL4/UAS-dTrpA1</i>                  | 0.0008                  |
|                |                               | <i>LexAop2-GAL80/R43D01-LexA; R72D07-GAL4/UAS-dTrpA1 V/S LexAop2-GAL80/+; R72D07-GAL4/UAS-dTrpA1</i> | 0.019                   |
| <b>Fig. 6B</b> | (22°C)<br>0.2524              | P values >0.05                                                                                       | P values >0.05          |
|                | (30°C)<br>0.0026              | <i>LexAop2-GAL80/R43D01-LexA; R72D07-GAL4/UAS-dTrpA1 V/S R72D07-GAL4/UAS-dTrpA1</i>                  | 0.0021                  |
|                |                               | <i>LexAop2-GAL80/R43D01-LexA; R72D07-GAL4/UAS-dTrpA1 V/S LexAop2-GAL80/+; R72D07-GAL4/UAS-dTrpA1</i> | 0.0246                  |
| <b>Fig. 6C</b> | (22°C)<br>0.4230              | P values >0.05                                                                                       | P values >0.05          |
|                | (30°C)<br>0.9474              | P values >0.05                                                                                       | P values >0.05          |
| <b>Fig. 6D</b> | (22°C)<br>0.5723              | P values >0.05                                                                                       | P values >0.05          |
|                | (30°C)<br>0.9657              | P values >0.05                                                                                       | P values >0.05          |

**Dataset 2:** List of *P* values

|                 | <b>Kruskal Wallis P-value</b> | <b>Post-hoc Dunn's multiple comparisons test</b>                                       | <b>Adjusted P-value</b> |
|-----------------|-------------------------------|----------------------------------------------------------------------------------------|-------------------------|
| <b>Fig. S2A</b> | (22°C)<br>0.8622              | P values >0.05                                                                         | P values >0.05          |
|                 | (30°C)<br>0.0001              | <i>TSHIRT-GAL80/+; R72D07-GAL4/UAS-dTrpA1</i> V/S <i>R72D07-GAL4/UAS-dTrpA1</i>        | >0.9999                 |
|                 |                               | <i>TSHIRT-GAL80/+; R72D07-GAL4/UAS-dTrpA1</i> V/S <i>TSHIRT-GAL80/+; R72D07-GAL4/+</i> | 0.0006                  |
| <b>Fig. S2B</b> | (22°C)<br>0.7978              | P values >0.05                                                                         | P values >0.05          |
|                 | (30°C)<br>0.0007              | <i>TSHIRT-GAL80/+; R72D07-GAL4/UAS-dTrpA1</i> V/S <i>R72D07-GAL4/UAS-dTrpA1</i>        | >0.9999                 |
|                 |                               | <i>TSHIRT-GAL80/+; R72D07-GAL4/UAS-dTrpA1</i> V/S <i>TSHIRT-GAL80/+; R72D07-GAL4/+</i> | 0.0029                  |
| <b>Fig. S2C</b> | (22°C)<br>0.3228              | P values >0.05                                                                         | P values >0.05          |
|                 | (30°C)<br>0.0003              | <i>TSHIRT-GAL80/+; R72D07-GAL4/UAS-dTrpA1</i> V/S <i>R72D07-GAL4/UAS-dTrpA1</i>        | 0.6298                  |
|                 |                               | <i>TSHIRT-GAL80/+; R72D07-GAL4/UAS-dTrpA1</i> V/S <i>TSHIRT-GAL80/+; R72D07-GAL4/+</i> | 0.0065                  |
| <b>Fig. S2D</b> | (22°C)<br>0.2585              | P values >0.05                                                                         | P values >0.05          |
|                 | (30°C)<br><0.0001             | <i>TSHIRT-GAL80/+; R72D07-GAL4/UAS-dTrpA1</i> V/S <i>R72D07-GAL4/UAS-dTrpA1</i>        | 0.7992                  |
|                 |                               | <i>TSHIRT-GAL80/+; R72D07-GAL4/UAS-dTrpA1</i> V/S <i>TSHIRT-GAL80/+; R72D07-GAL4/+</i> | 0.0016                  |

**Dataset 2: List of P values**

|                 | <b>Kruskal Wallis P-value</b> | <b>Post-hoc Dunn's multiple comparisons test</b> | <b>Adjusted P-value</b> |
|-----------------|-------------------------------|--------------------------------------------------|-------------------------|
| <b>Fig. S7A</b> | (22°C)<br>0.1136              | P values >0.05                                   | P values >0.05          |
|                 | (30°C)<br><0.0001             | <i>R43D01-GAL4/UAS-dTrpA1 V/S R43D01-GAL4/+</i>  | <0.0001                 |
|                 |                               | <i>R43D01-GAL4/UAS-dTrpA1 V/S UAS-dTrpA1/+</i>   | 0.0014                  |
| <b>Fig. S7B</b> | (22°C)<br>0.0077              | <i>R43D01-GAL4/UAS-dTrpA1 V/S R43D01-GAL4/+</i>  | 0.0053                  |
|                 |                               | <i>R43D01-GAL4/UAS-dTrpA1 V/S UAS-dTrpA1/+</i>   | 0.0517                  |
|                 | (30°C)<br><0.0001             | <i>R43D01-GAL4/UAS-dTrpA1 V/S R43D01-GAL4/+</i>  | <0.0001                 |
|                 |                               | <i>R43D01-GAL4/UAS-dTrpA1 V/S UAS-dTrpA1/+</i>   | 0.0143                  |

|                 | <b>Kruskal Wallis P-value</b> | <b>Post-hoc Dunn's multiple comparisons test</b>                           | <b>Adjusted P-value</b> |
|-----------------|-------------------------------|----------------------------------------------------------------------------|-------------------------|
| <b>Fig. S8A</b> | (25°C)<br>0.0495              | <i>UAS-Dcr2/UAS-GAD1 RNAi ; R43D01-GAL4 V/S UAS-Dcr2/+ ; R43D01-GAL4/+</i> | 0.063                   |
|                 |                               | <i>UAS-Dcr2/UAS- GAD1 RNAi ; R43D01-GAL4 V/S UAS-GAD1 RNAi/+</i>           | 0.0704                  |
| <b>Fig. S8B</b> | (25°C)<br>0.3558              | P values >0.05                                                             | P values >0.05          |
| <b>Fig. S8C</b> | (25°C)<br>0.0230              | <i>UAS-Dcr2/UAS-GAD1 RNAi ; R43D01-GAL4 V/S UAS-Dcr2/+ ; R43D01-GAL4/+</i> | 0.0291                  |
|                 |                               | <i>UAS-Dcr2/UAS- GAD1 RNAi ; R43D01-GAL4 V/S UAS-GAD1 RNAi/+</i>           | 0.0404                  |
| <b>Fig. S8D</b> | (25°C)<br>0.0090              | <i>UAS-Dcr2/UAS-GAD1 RNAi ; R43D01-GAL4 V/S UAS-Dcr2/+ ; R43D01-GAL4/+</i> | 0.0125                  |

**Dataset 2:** List of *P* values

|  |  |                                                                   |        |
|--|--|-------------------------------------------------------------------|--------|
|  |  | <i>UAS-Dcr2/UAS- GAD1 RNAi ; R43D01- GAL4 V/S UAS-GAD1 RNAi/+</i> | 0.0191 |
|--|--|-------------------------------------------------------------------|--------|
